# Supplementary material for: A Novel Intragenic Duplication in the HDAC8 Gene Underlying a Case of Cornelia de Lange Syndrome
Source: MDPI journal article supplement (doi:10.3390/genes13081413), 2022-08-08
Supplement: s1 [file s1]

**Table S1. Insertion 96 pb sequence**

| Insertion 96 pb                                                                                       |
|-------------------------------------------------------------------------------------------------------|
| AATATGCCTGTGAACACCTAGAGGACCCCAGAGGAGGTCTCATCCATCTTTATAGTCCCTC<br>TGCAACAAGCACAAATGACCTGCATGTGATGTGCAG |

<sup>1</sup>Tables may have a footer.

**Table S2. WT protein sequence**

| WT HDAC8 sequence                                                                                                                                                                                                                                                                                                                                                                                             |
|---------------------------------------------------------------------------------------------------------------------------------------------------------------------------------------------------------------------------------------------------------------------------------------------------------------------------------------------------------------------------------------------------------------|
| MEEPEEPADSGQSLVPVYIYSPEYVSMCDLAKIPKRASMVHSLIEAYALHKQMRIVKPKVASME<br>EMATFHTDAYLQHLQKVSQEGDDDDHPDSIEYGLGYDCPATEGIFDYAAAIGGATITAAQCLID<br>GMCKVAINWSGGWHHAKKDEASGFCYLNDVGLGILRLRRKFERILYVDLDLHHGDGVEDAFS<br>FTSKVMTVSLHKFSPGFFPGTGDVSDVGLGKGRYYSVNVPIQDGIQDEKYYQICESVLKEYYQAF<br>NPKAVVLQLGADTIAGDPMCSFNMTVPVGIGKCLKYILQWQLATLILGGGGYNLANTARCWTY<br>LTGVILGKTLSEIPDHEFFTAYGPDYVLEITPSCRPNRNEPHRIQQILNYIKGNLKHVV |

**Table S3. Variant protein sequence**

| Variant protein HDAC8 sequence                                                                                                                                                                                                                                                                                                                                                                                                                             |
|------------------------------------------------------------------------------------------------------------------------------------------------------------------------------------------------------------------------------------------------------------------------------------------------------------------------------------------------------------------------------------------------------------------------------------------------------------|
| MEEPEEPADSGQSLVPVYIYSPEYVSMCDLAKIPKRASMVHSLIEAYALHKQMRIVKPKVASME<br>EMATFHTDAYLQHLQKVSQEGDDDDHPDSIEYGLGYDCPATEGIFDYAAAIGGATITAAQCLID<br>GMCKVAINWSGGWHHAKKDEASGFCYLNDVGLGILRLRRKFERILYVDLDLHHGDGVEDAFS<br>FTSKVMTVSLHKFSPGFFPGTGDVSDVGLGKGRYYSVNVPIQDGIQDEKYYQICESVLKEYYQAF<br>NPKAVVLQLGADTIAGDPMCSFNMTVPVGIGKCLKYILQWQLATLILGGGGYNLANTARCWTY<br>LTGVILGKTLSEIPDHE <b>NMPVNT*RTPEEVSSIFIVPLQQAQ*PACDVQ</b> FFTAYGPDYVLEITPSCR<br>PDRNEPHRIQQILNYIKGNLKHVV |
